# Supplementary material
Source: PubMed Central journal article supplement (PMC3203706)
Supplement: cr201169x1.pdf [file cr201169x1.pdf]

## Supplementary information, Table S1

|         | Age | Sex | Mobilizing condition |           | Blood vol. | PBMNC<br>( $\times 10^7$ ) | BBHS<br>formation | SCID BMT |
|---------|-----|-----|----------------------|-----------|------------|----------------------------|-------------------|----------|
|         |     |     | Hx.†                 | Sys/P.E.‡ |            |                            |                   |          |
| Donor 1 | 31  | M   | none                 | none      | 140        | 24.7                       | yes               | o        |
| Donor 2 | 29  | M   | none                 | none      | 140        | 27.9                       | yes               | o        |
| Donor 3 | 28  | M   | none                 | none      | 150        | 30.3                       | yes               | o        |
| Donor 4 | 26  | M   | none                 | none      | 150        | 32.5                       | yes               | o        |
| Donor 5 | 27  | M   | none                 | none      | 150        | 23.4                       | yes               | -        |
| Donor 6 | 31  | M   | none                 | none      | 130        | 21.6                       | yes               | -        |
| Donor 7 | 30  | M   | none                 | none      | 150        | 25.2                       | yes               | -        |
| Donor 8 | 27  | M   | none                 | none      | 130        | 21.5                       | yes               | -        |
| Donor 9 | 25  | M   | none                 | none      | 160        | 33.6                       | yes               | -        |

† Excluded if one of the following is present on donor's medical history

1. Malignancy and/or related chemotherapy
2. Ischemic stroke or myocardial infarct
3. Unresolved infection or local inflammatory disease
4. Significant active CNS disease or seizures within the past year.
5. Blood donation within past 90 days
6. Leukapheresis or lymphoperesis within 180days
7. Prior medication medical treatment
  - 1) G-CSF or GM-CSF within the past 6 months
  - 2) Treatment for infection within the past 14 days
  - 3) Any kind of endoscopic procedure within the past 7 days
  - 4) Other medication which can possibly affect stem cell mobilization
8. Other medical conditions which can possibly affect stem cell mobilization
9. Other medical conditions which contraindicate blood donation.

‡ Excluded if one of the following sign is present on systemic review and physical examination of the donor

1. Systemic inflammation (i.e. fever or chill, severe hyper/hypothermia)
2. Local infection or inflammation
3. Active bleeding
4. Moderate or severe anemia
5. Other medical conditions which can possibly affect stem cell mobilization
6. Other medical conditions which contraindicate blood donation.

**Table S1** Donor information on study PBMNC
