# Supplementary material
Source: PubMed Central journal article supplement (PMC3203706)
Supplement: cr201169x2.pdf [file cr201169x2.pdf]

## Supplementary information, Figure S1

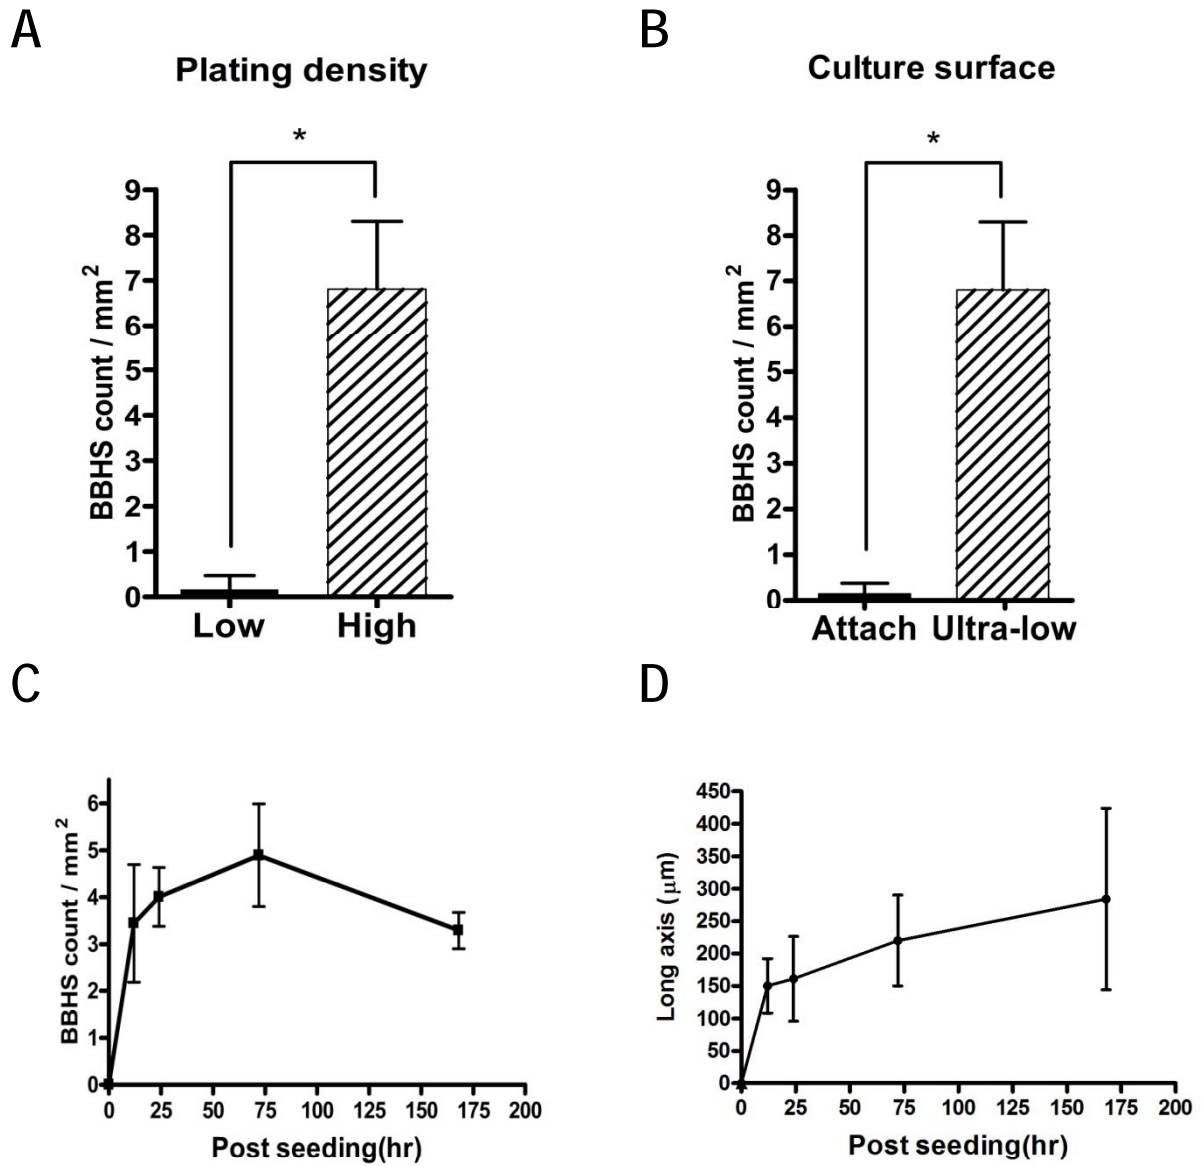

**Figure S1** Optimized spheroid culture of MNCs. Effect of the plating density (A) and of the surface of culture dishes (B) on BBHS count after 24h. Numbers (C) and average sizes (D) of BBHS over 7 days.
