# Supplementary material
Source: PubMed Central journal article supplement (PMC3203706)
Supplement: cr201169x4.pdf [file cr201169x4.pdf]

## Supplementary information, Figure S3

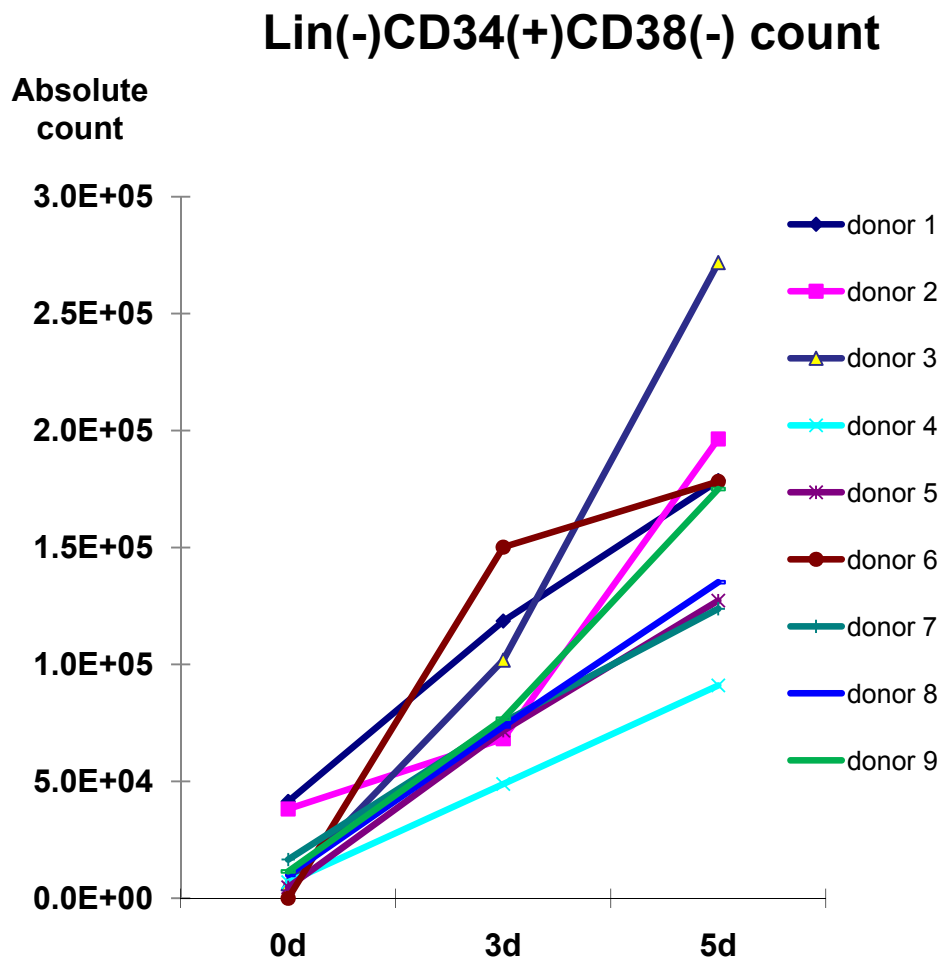

|              | 0d PBMNC  | BBHS 3d   | BBHS 5d   |
|--------------|-----------|-----------|-----------|
| % in Lin(-)  | 0.70      | 4.75      | 7.18      |
| % in TNC     | 0.09      | 0.89      | 1.61      |
| TNC          | 1.835E+07 | 9.782E+06 | 9.768E+06 |
| Absolute HSC | 16742.65  | 87212.39  | 157113.97 |
| (S.E.M.)     | 4560.10   | 10318.70  | 18449.35  |

**Figure S3** Absolute count of Lin(-)CD34(+)CD38(-) HSPC of individual donors during BBHS culture. HSPC count at the start of culture (0d,  $2 \times 10^7$  MNCs) and HSPC count in BBHS culture at day 3 and day 5 are depicted.
