# Supplementary material
Source: PubMed Central journal article supplement (PMC3203706)
Supplement: cr201169x5.pdf [file cr201169x5.pdf]

## Supplementary information, Figure S4

### Ki-67

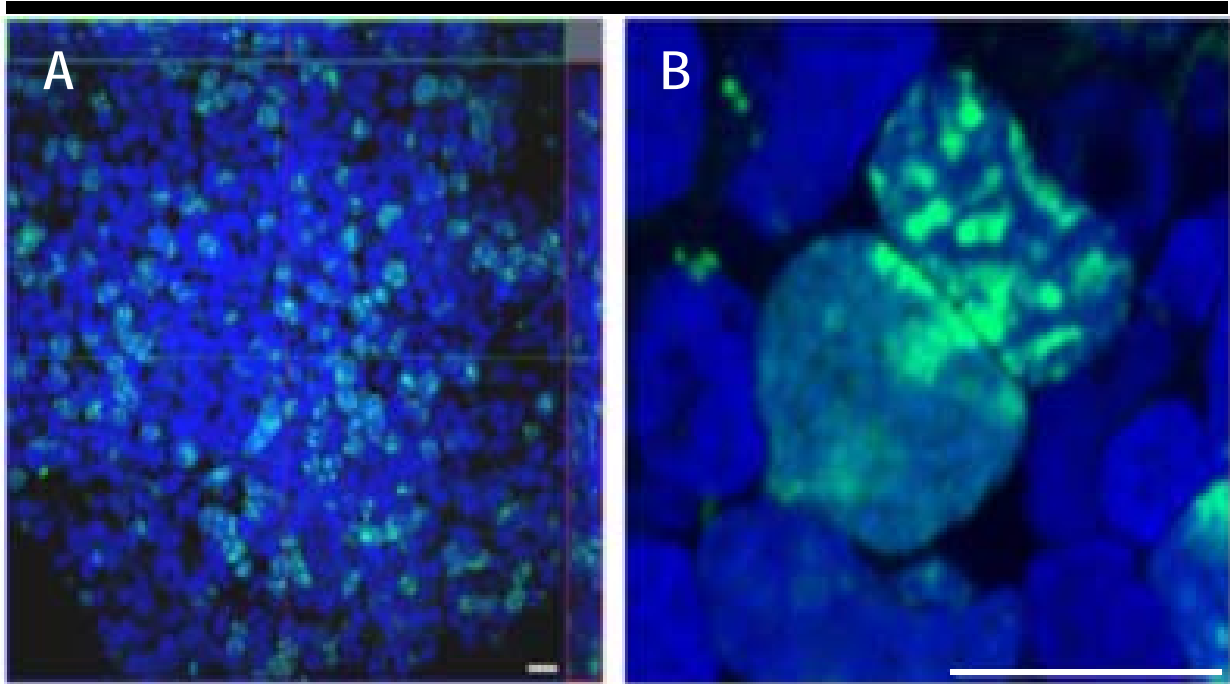

### CD34

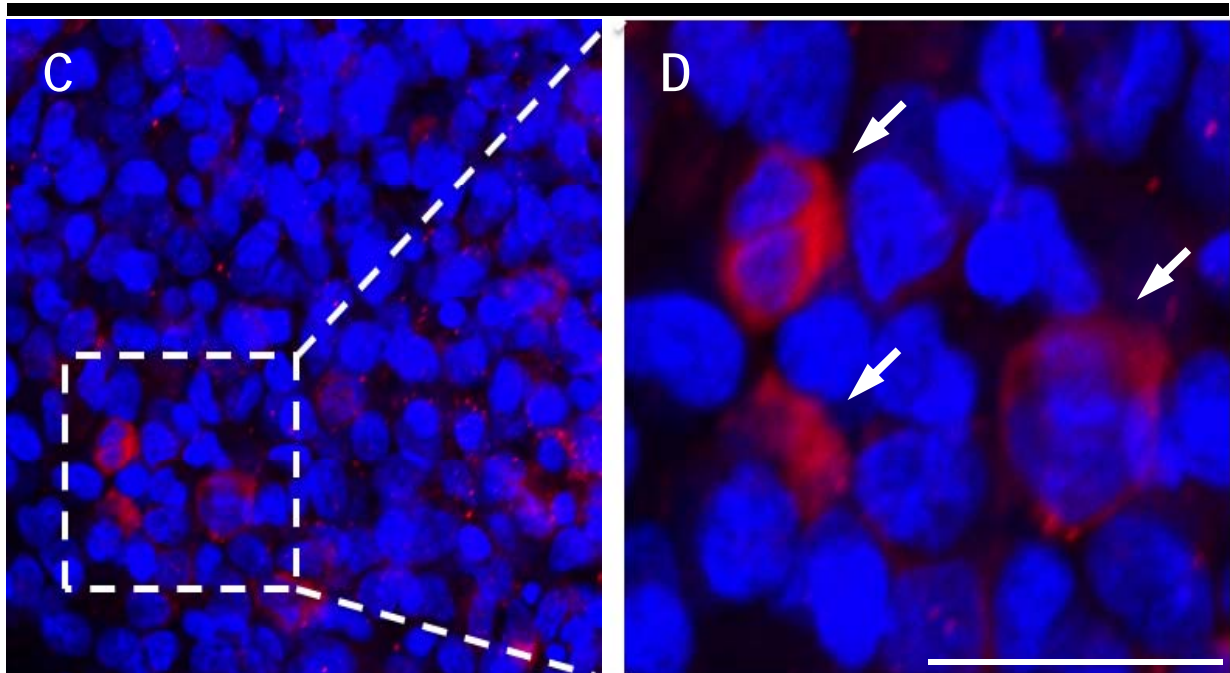

**Figure S4** HSPC localization and expansion in BBHS . (A) Ki-67(+)-proliferating cells in BBHS. (B) Ki-67(+) cell undergoing mitosis. Scale bar, 10  $\mu$ m. (C) CD34-positive cells(red) in BBHS. (D) High power field of CD34-positive cells in BBHS. Arrows indicate CD34-positive cells in BBHS. Nuclei were counterstained with To-pro 3 (blue). Scale bar, 20  $\mu$ m.
