# Supplementary material
Source: PubMed Central journal article supplement (PMC3203706)
Supplement: cr201169x6.pdf [file cr201169x6.pdf]

## Supplementary information, Figure S5

A

Spleen

| Primary BMT  |            | Secondary BMT |            |
|--------------|------------|---------------|------------|
| human CD45 † | 16.3 ± 4.2 | human CD45 †  | 7.7 ± 0.2  |
| CD14 ‡       | 12.5 ± 5.1 | CD14 ‡        | 20.0 ± 1.6 |
| CD3 ‡        | 18.2 ± 3.0 | CD3 ‡         | 14.3 ± 1.3 |
| CD19 ‡       | 10.7 ± 4.3 | CD19 ‡        | 5.5 ± 1.0  |

† Percentage in total mouse and human CD45 cells

‡ Percentage in total human CD45 cells

B

| Primary BMT † |             | Secondary BMT † |             |
|---------------|-------------|-----------------|-------------|
| Adipose ts.   | 67.7 ± 12.4 | Adipose ts.     | 50.2 ± 10.8 |
| Kidney        | 83.4 ± 4.4  | Kidney          | 69.0 ± 4.7  |
| Liver         | 51.1 ± 4.9  | Liver           | 61.8 ± 6.2  |
| Lymph node    | 59.1 ± 12.3 | Lymph node      | 83.1 ± 9.3  |

† Percentage in total mouse and human CD45 cells

**FigureS5.** BBHS-derived HSPC engraftment of solid organs. (A) Hematopoietic chimerism and hematopoietic lineage composition of splenocytes in primary (n=4) and secondary BMT (n=2) (B) Human hematopoietic cell chimerism of mononuclear cell derived from potential homing sites (adipose tissue, kidney, liver and lymph nodes) 12 weeks after primary and secondary BMT. Numbers indicate the mean ± S.E.M of each experiment.
