# Supplementary material
Source: PubMed Central journal article supplement (PMC3203706)
Supplement: cr201169x7.pdf [file cr201169x7.pdf]

## Supplementary information, Figure S6

| Standard Media                                                                      | HSC Expansion Media                                                                                                                       |                                                                                      |
|-------------------------------------------------------------------------------------|-------------------------------------------------------------------------------------------------------------------------------------------|--------------------------------------------------------------------------------------|
| <b>EBM-2 (5% FBS)</b><br><br>(Lonza)                                                | <b>StemSpan®H3000</b><br>Xeno-Free Defined<br>Medium for Expansion<br>and Culture of<br>Hematopoietic Cells<br>(STEMCELL<br>Technologies) | <b>Stemline™ II</b><br>Hematopoietic Stem<br>Cell Expansion Medium<br><br>(Sigma)    |
| 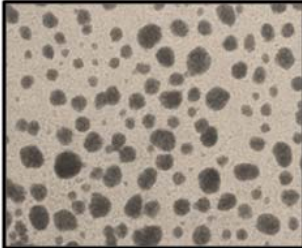  |                                                         |   |
| Media without Serum supplement                                                      |                                                                                                                                           |                                                                                      |
| <b>OptiMEM</b><br>20%Knockout™<br>Serum Replacement<br><br>(Invitrogen)             | <b>mTeSR®1</b><br>Serum-free Medium<br><br>(STEMCELL<br>Technologies)                                                                     | <b>StemPro®-34</b><br>Serum-free Medium<br><br>(Invitrogen)                          |
|  |                                                        |  |

**Figure S6** Comparison of different media without serum supplement for BBHS culture.
