# Supplementary material
Source: PubMed Central journal article supplement (PMC3203706)
Supplement: cr201169x8.pdf [file cr201169x8.pdf]

## Supplementary information, Figure S7

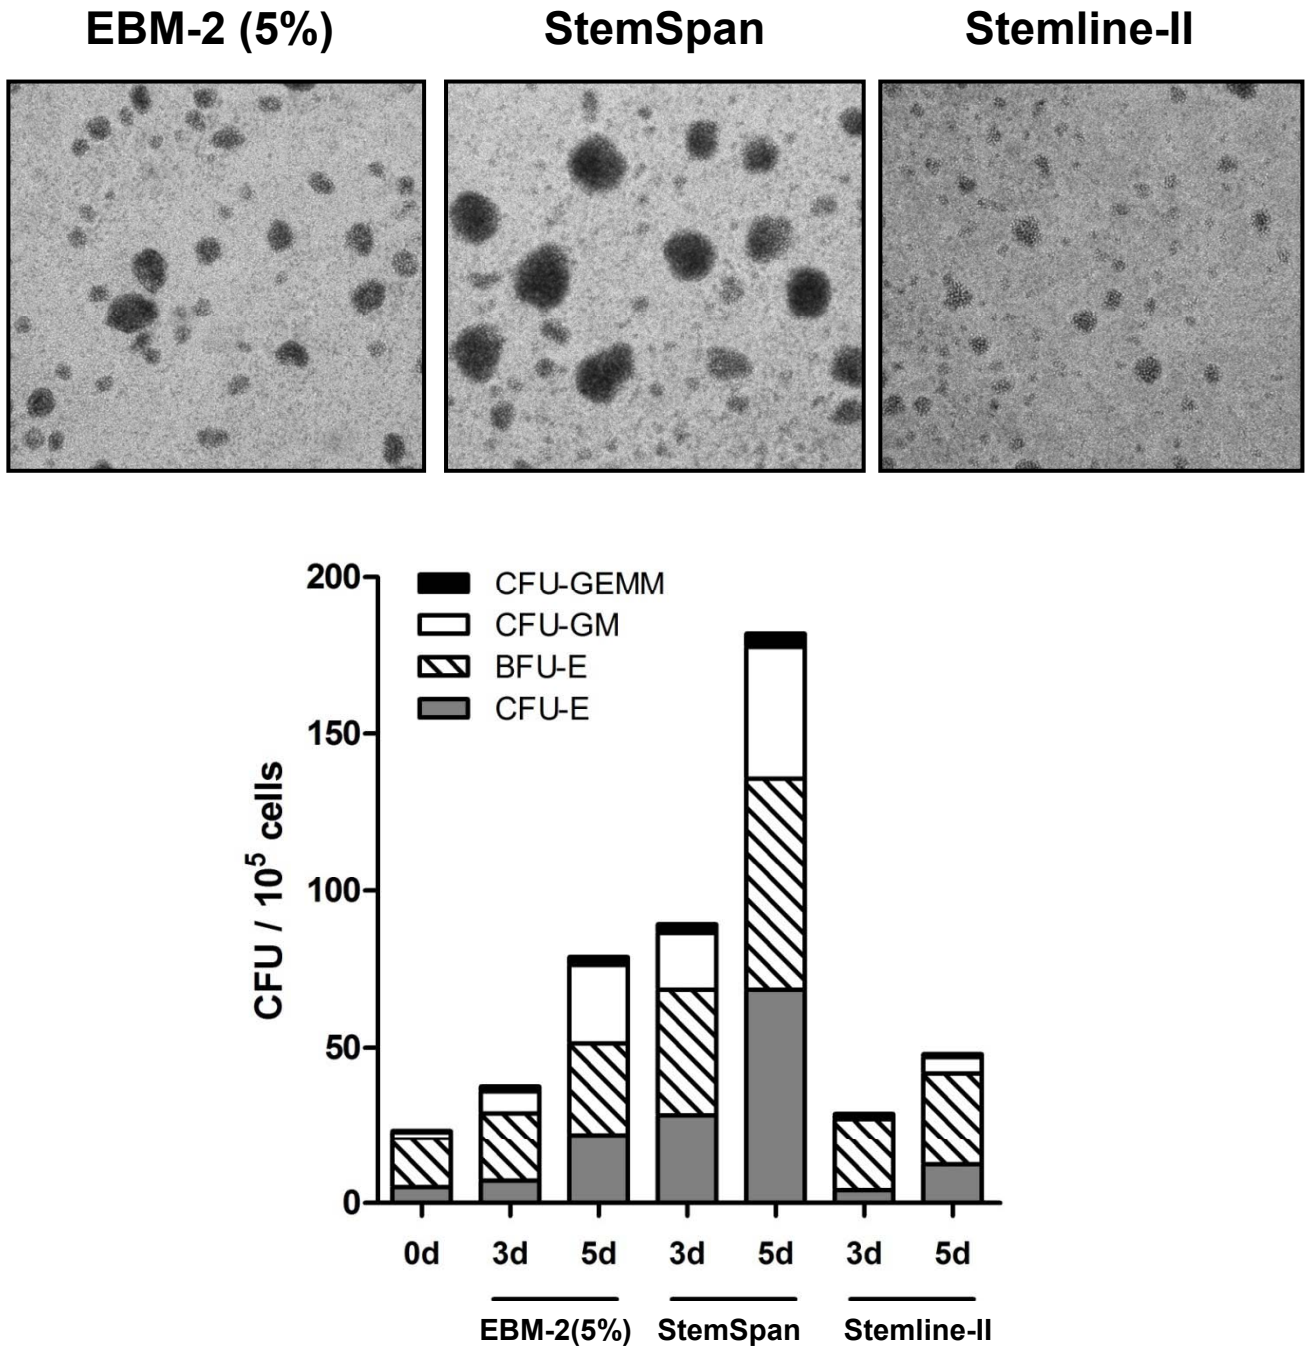

**Figure S7** Comparison of defined hematopoietic support media with EBM5%FBS. Sphere formation in BBHS culture and CFU quantification.
