# Supplementary material
Source: PubMed Central journal article supplement (PMC3203706)
Supplement: cr201169x9.pdf [file cr201169x9.pdf]

## Supplementary information, Figure S8

### Lin(-)CD34(+)CD38(-) HSC

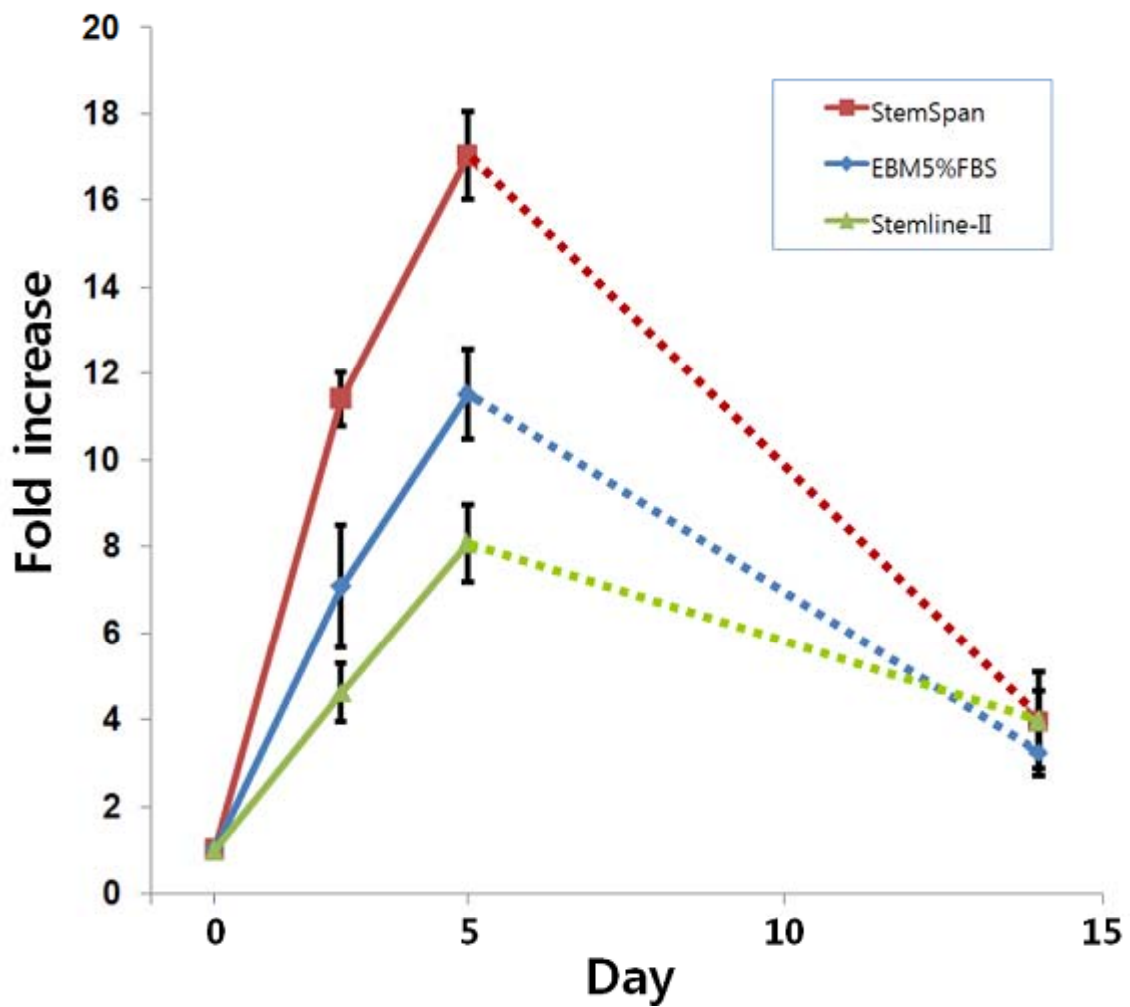

**Figure S8** Comparison of Lin(-)CD34(+)CD38(-) HSC expansion with defined hematopoietic support media.
