# Supplementary material
Source: PubMed Central journal article supplement (PMC3203706)
Supplement: cr201169x11.pdf [file cr201169x11.pdf]

## Supplementary information, Figure S10

### CD45

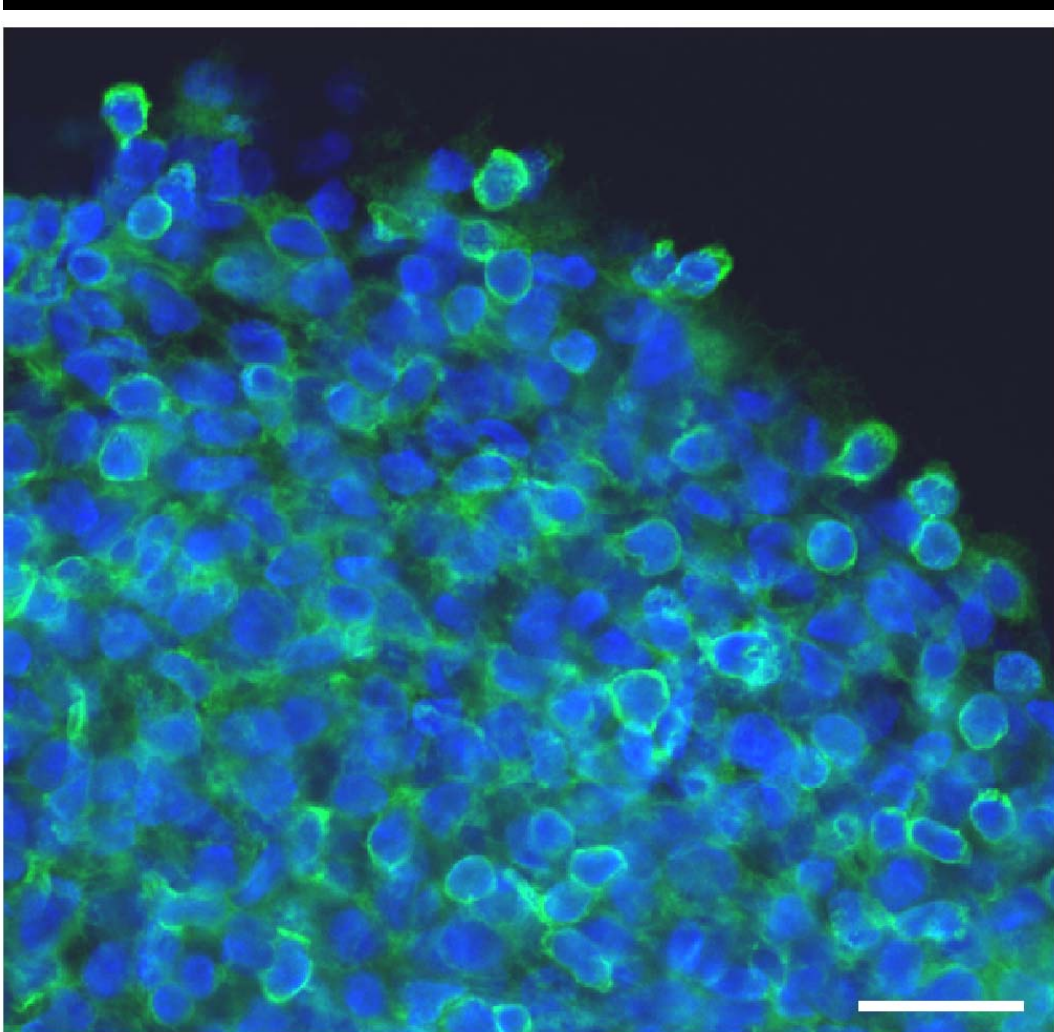

**Figure S10** Whole-mount staining of BBHS with panleukocyte marker CD45. The sphere is entirely consisted of CD45(+) cells of hematopoietic origin. Scale bar, 20  $\mu$ m. Nuclei were counterstained with To-pro 3.
