# Supplementary material
Source: PubMed Central journal article supplement (PMC3203706)
Supplement: cr201169x12.pdf [file cr201169x12.pdf]

**Supplementary information, Figure S11**

**CD14**

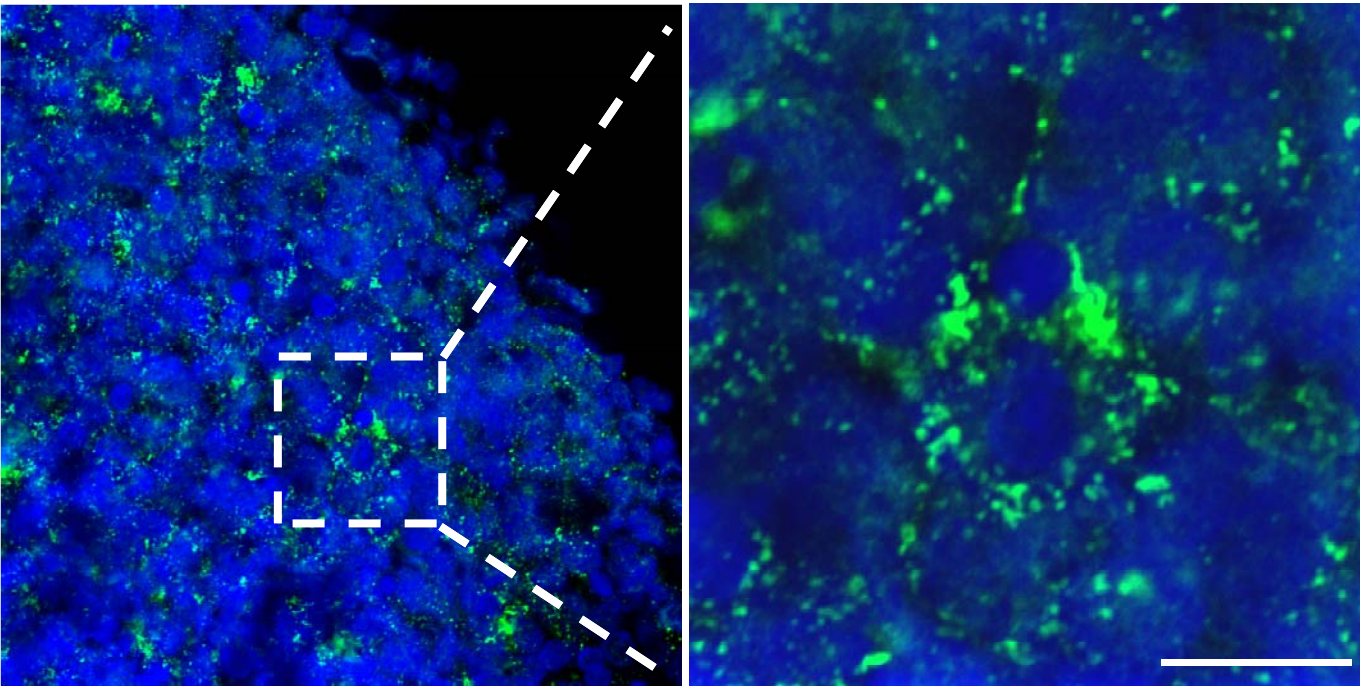

**Figure S11** Whole-mount staining of BBHS. Myeloid CD14-positive cells are main cellular components of BBHS. Scale bar, 10  $\mu$ m. Nuclei were counterstained with To-pro 3.
