# Supplementary material
Source: PubMed Central journal article supplement (PMC3203706)
Supplement: cr201169x14.pdf [file cr201169x14.pdf]

## Supplementary information, Figure S13

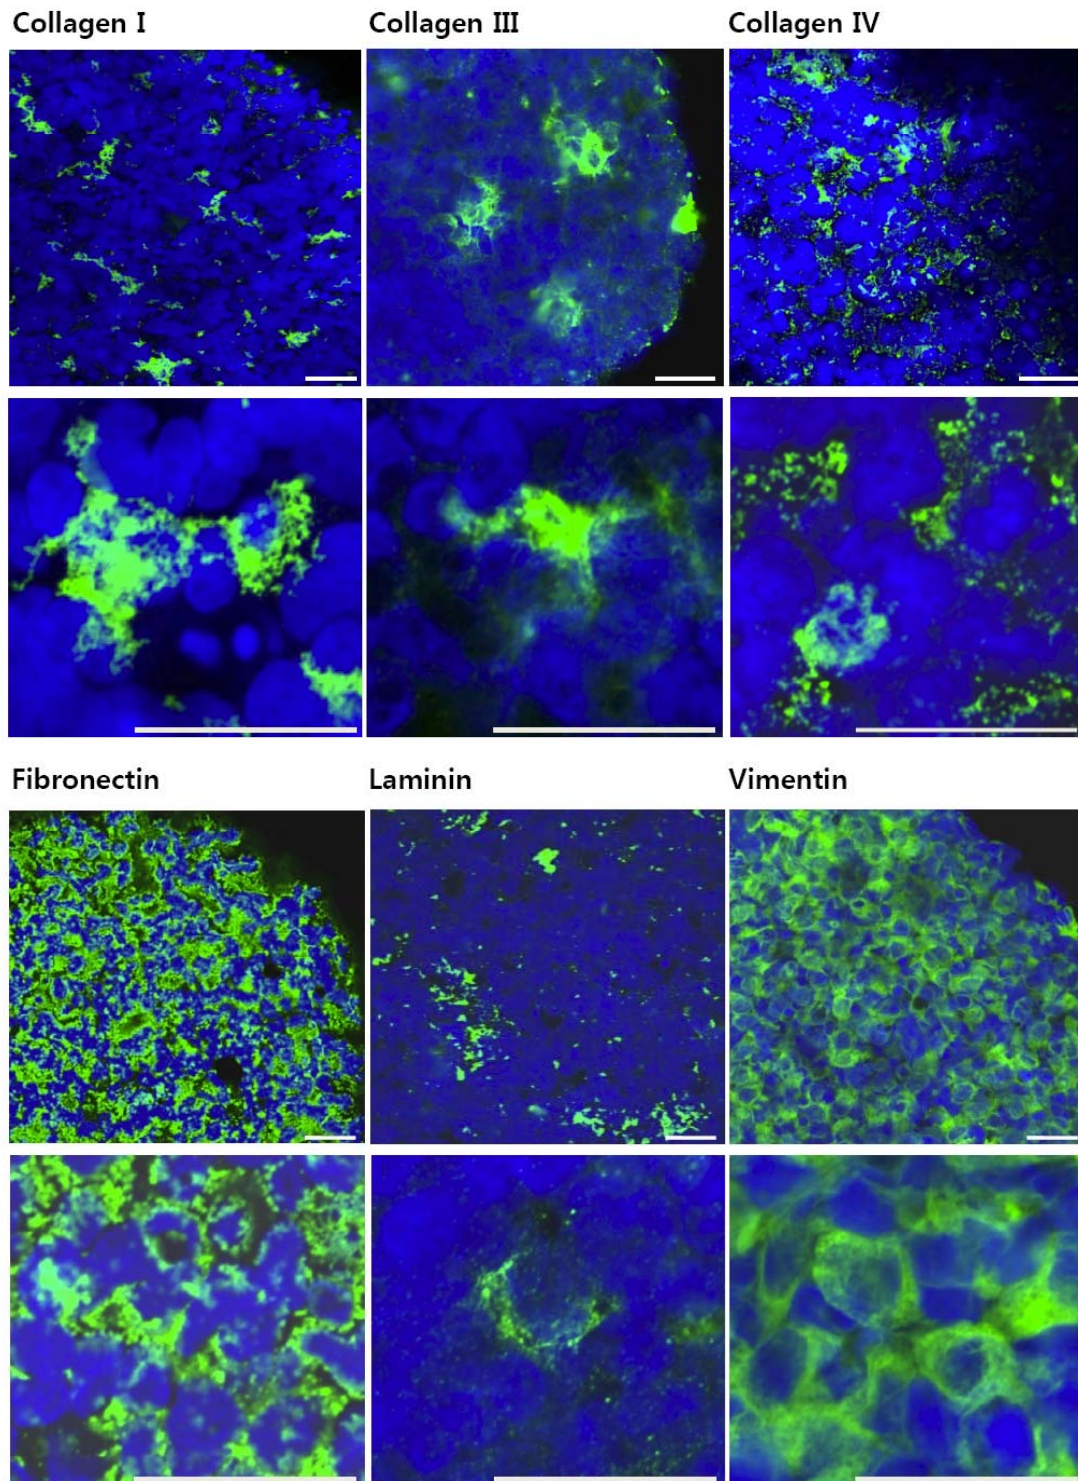

**Figure S13** Whole-mount immunostaining of BBHSs. Low(upper panel) and High(lower panel) power field image of confocal microscopy shows individual ECM secreting cells in BBHS. Scale bar, 20  $\mu$ m. Nuclei were counterstained with To-pro 3.
