# Supplementary material
Source: PubMed Central journal article supplement (PMC3203706)
Supplement: cr201169x15.pdf [file cr201169x15.pdf]

**Supplementary information, Figure S14**

**Integrin  $\alpha V\beta 1$**

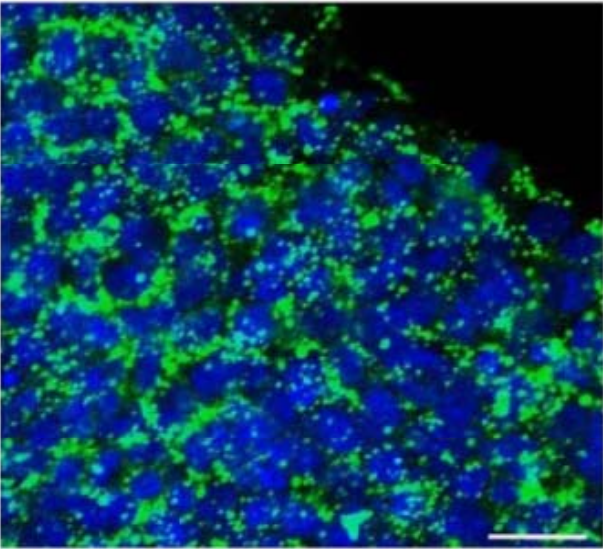

**Figure S14** Expression of fibronectin receptor Integrin  $\alpha V\beta 1$  in BBHS. Whole-mount immunostaining of BBHS shows Integrin  $\alpha V\beta 1$  expression over the spheres.
