# Supplementary material
Source: PubMed Central journal article supplement (PMC3203706)
Supplement: cr201169x16.pdf [file cr201169x16.pdf]

## Supplementary information, Figure S15

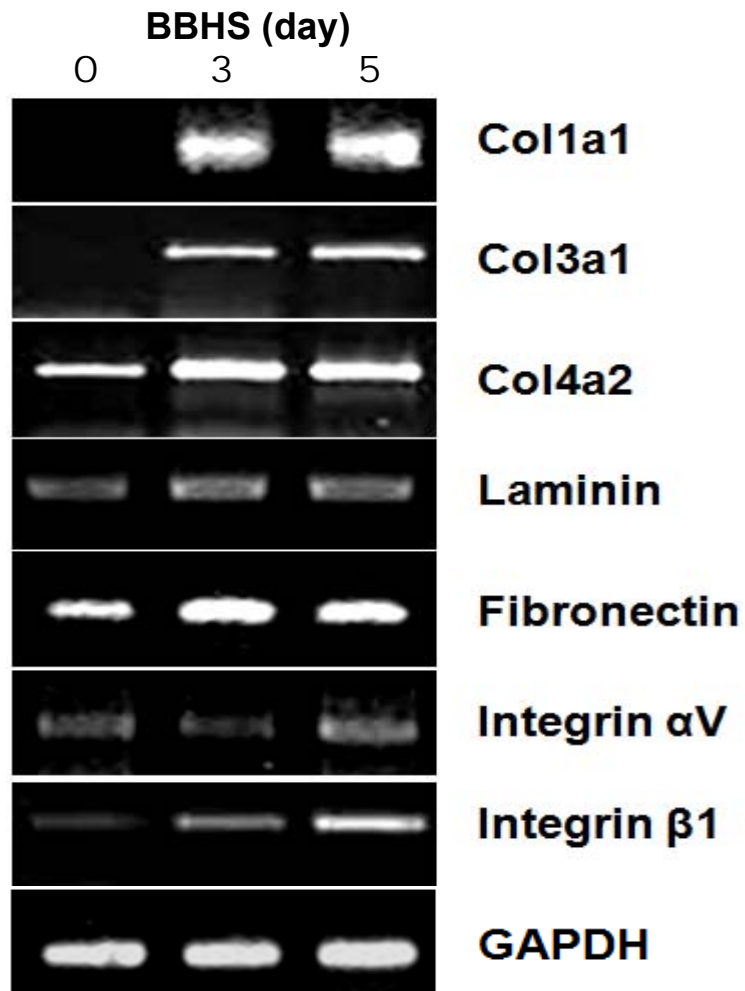

**Figure S15** BBHS culture up-regulates gene expression of niche components. Peripheral blood MNC and BBHS culture at day 3, 5 were subjected to RT-PCR for niche component gene expression.
