# Supplementary material
Source: PubMed Central journal article supplement (PMC3203706)
Supplement: cr201169x17.pdf [file cr201169x17.pdf]

## SUPPLEMENTARY INFORMATION, Data S1

### MATERIALS AND METHODS

2

#### 3 **Peripheral blood sample and generation of Blood-Born Hematospheres (BBHSs)**

4 All study protocols in this study were approved by the Institutional Review Board of Seoul  
5 National University Hospital. Fresh peripheral blood (PB) was obtained from healthy donors  
6 (mean age  $28.2 \pm 4.9$ ) with informed consent. Donors with mobilizing condition were screen  
7 based on history, systemic review and physical examination by medical doctor (Supplementary  
8 Table 1). Human peripheral blood mononuclear cells (MNCs) were isolated by Ficoll-Paque™  
9 PLUS (GE healthcare) according to manufacturer's instructions and were washed five times  
10 with phosphate buffered saline (PBS). For culture of BBHSs, MNCs were resuspended at 3-  
11  $5 \times 10^6$  cells/ml in EBM-2 with 5%FBS and seeded on Hydrocell™ Ultra-Low attach surface  
12 (NUNC). 1ml of EBM-2 with 5%FBS fresh medium was added every third day without media  
13 change. BBHSs were followed-up every day.

14

#### 15 **Gene expression analysis**

16 Total RNA was extracted from fresh MNCs or cultured BBHSs using TRIZOL reagent  
17 (Invitrogen) according to manufacturer's instruction. RT-PCR was performed as described  
18 previously. cDNA was synthesized using a Primescript 1st strand cDNA synthesis kit

1 (TAKARA) and oligo-dT primer. Primer for human collagen I (P155768), collagen IV (P105000),  
2 human Fibronectin (P142696) and human laminin (P153523) were purchased from Bioneer  
3 (<http://bioneer.co.kr>). Information for other primers is provided in Supplementary table 2.

4

#### 5 **Fluorescent Activated Cell Sorter (FACS) analysis**

6 Flow cytometry was performed as described previously. Fresh MNCs were prepared as above.  
7 Cultured BBHSs were treated with 0.5mg/ml dispase (Gibco) and 0.125% Trypsin-EDTA for 5  
8 min at 37°C to dissociate into single cells and washed with PBS. Cells from xenotransplanted  
9 NOG/SCID mice are described below. Cells were stained with antibodies specific for cell  
10 surface markers and analyzed by flow cytometry using a BD Canto II <sup>TM</sup> ([Becton Dickinson](#)).  
11 FITC-labeled antibody for lineage (Lin) was CD3, CD14, CD16, CD19, CD20 and CD56 ([BD](#)  
12 [Pharmingen](#)). PE-labeled antibodies were human CD38, mouse CD45 (eBioscience). APC-  
13 Cy7-labeled antibody was human CD45 (BD Pharmingen). Allophycocyanin (APC)-labeled  
14 antibody was human CD34 (BD Pharmingen). The appropriate isotype antibodies served as  
15 negative controls.

16

#### 17 **Whole mount Immunostaining of BBHS**

18 For immunocytochemistry, cultured BBHSs were fixed in 2% cold paraformaldehyde for 10 min

1 on ice and washed with PBS-T twice. As stem/progenitor markers, we used antibodies against  
2 CD34 (1:200; BD Pharmingen). As extracellular components markers, we used antibodies  
3 against collagen I (1:400; Southern Biotech), collagen III (1:400; Southern Biotech), collagen  
4 IV (1:400; Southern Biotech), fibronectin (1:500; BD Pharmingen) and laminin (1:500; Abcam).  
5 As proliferation markers, we used antibody against Ki-67 (1:400; Abcam). Integrin  $\alpha V\beta 1$  was  
6 stained as fibronectin receptor (1:200; Chemicon). To define hematopoietic population in BBHS  
7 we used CD14 (1:200, BD Pharmingen) and CD45 (1:200, BD Pharmingen). To visualize SDF-  
8 1-CXCR4 axis we used SDF-1 (1:200, R&D Systems) and CXCR4 (1:200, eBiosciences).

9

#### 10 **Colony-Forming-Unit Assay of BBHSs**

11 Colony-forming unit (CFU) assay was performed using MethoCult GF H4434 (Stem Cell  
12 Technologies, Vancouver).  $1 \times 10^5$  freshly isolated MNC or its equivalent of single-suspended  
13 BBHS cells were plated in triplicate and cultured for 14 days at 37°C with 5% carbon dioxide in  
14 a humidified atmosphere. CFU-E were numerated on day 7 and BFU-E, CFU-GM and CFU-  
15 GEMM were numerated on day 14 of the assay. Colonies were visualized under inverted  
16 microscope, classified according to their morphological characteristics and counted.

17

#### 18 **In vivo Bone Marrow (BM) Repopulation of BBHS derived HSPCs**

1 Xenotransplantation of the BBHSs was performed by modification of the method previously  
2 described. Briefly, 8-to-10 week old severe immunocompromised NOD/Shi-scid IL2Rg<sup>null</sup> (NOG-  
3 SCID) mice were given 240 rads of whole body irradiation to ablate the hematopoietic system  
4 partially.  $5 \times 10^4$  single-suspended BBHS (Day 5 to 7) cells were injected through intracardiac  
5 puncture. Mice were anesthetized and killed by cervical dislocation 12 weeks after  
6 transplantation. To assess hematopoietic chimerism, Peripheral blood (PB) was collected by  
7 puncture of the left ventricle of the heart. Femurs, tibiae and humeri were collected and flushed  
8 with PBS to liberate BM cells. Flushed BM aspirates were then filtered through a sterile 40- $\mu$ m  
9 cell strainer (BD Falcon) to get rid of clumps and debris. Spleens from mice were gently  
10 smashed by pressing with the flat surface of a syringe plunger, collected and filtered through a  
11 sterile 40- $\mu$ m cell strainer. After RBCs were lysed, leukocytes were processed for flow  
12 cytometric analysis. For secondary bone marrow repopulating experiment, whole chimeric  
13 bone marrow cells were tagged with mouse hematopoietic lineage / HSPC markers (PE-Ly6G,  
14 CD90.2, CD49b, CD45R/B220, CD45, c-kit, Prominin I and Sca-1 antibody) and human  
15 lineage markers (FITC-CD3, CD4, CD8, CD14, CD19 and CD56). Subsequently, anti-FITC and  
16 anti-PE magnetic beads were used to deplete the whole chimeric bone marrow of mouse cells  
17 and human non-HSPCs. The negative fraction was washed twice with PBS. Total  $5 \times 10^4$  cells of  
18 the human HSPC-enriched negative fraction were injected into NOG-SCID mice.

1

2 **Image acquisition**

3 Images were acquired using an Olympus IX2 inverted fluorescence microscope (Olympus,  
4 Tokyo, Japan) equipped with an Olympus DP50 CF CCD camera and analySIS 5.0 software.

5 Confocal images were acquired using Zeiss LSM-710 META confocal microscope and ZEN  
6 2008 analysis software.

7 **Statistical analysis**

8 Data are expressed as means  $\pm$  S.E.M. The statistical significance of difference between two  
9 groups was evaluated with an unpaired t-test and the significance between three groups was  
10 analyzed with one-way analysis of variance (ANOVA) followed by Bonferroni's method.

11 Probability values less than 5% were considered significant. All calculations were performed  
12 using SPSS 12.0.

13

## Supplementary information, Table S2

| primer                 | Sequence                                | T <sub>m</sub><br>(°C) | Access<br>Number | Product<br>size<br>(bp) |
|------------------------|-----------------------------------------|------------------------|------------------|-------------------------|
| Col3A1                 | Forward 5'- CCCACTATTATTTGGCACAACAG -3' | 62                     | NM_000090.3      | 244                     |
|                        | Reverse 5'- GCATGGTTCTGGCTTCCAGA -3'    |                        |                  |                         |
| ITGAV (Integrin<br>αV) | Forward 5'- TTGTTGCTACTGGCTGTTTTG -3'   | 57                     | NM_002210.3      | 469                     |
|                        | Reverse 5'- TCCCTTCTTGTTCTTCTTGAG -3'   |                        |                  |                         |
| ITGB1 (Integrin<br>β1) | Forward 5'- GAACGGCCCCTGACACCTGC -3'    | 62                     | NM_133376.4      | 290                     |
|                        | Reverse 5'- GCACCACCCACAATTTGGCCC -3'   |                        |                  |                         |
| GAPDH                  | Forward 5'- CAAATTCGTTGTCATACCAG -3'    | 60                     | NM_002046.3      | 504                     |
|                        | Reverse 5'- CGTGGAAGGACTCATGAC -3'      |                        |                  |                         |
| SDF-1a                 | Forward 5'- GCCGCACTTTCACTCTCCGT -3'    | 60                     | NM_199168.3      | 472                     |
|                        | Reverse 5'- TTTCTCGAGTGGGTCTAGCGGA -3'  |                        |                  |                         |
| CXCR4                  | Forward 5'- TACCCACACGGTGTGAGAAATGA -3' | 65.5                   | NM_001008540     | 449                     |
|                        | Reverse 5'- CCGCGCTTTCAGCAGACGCA -3'    |                        |                  |                         |

**Table S2** Primer sequences, T<sub>m</sub>s, and the sizes of PCR products
