# Supplementary material
Source: PubMed Central journal article supplement (PMC3203706)

**Supplementary information, Figure S9**

**EBM-2 (5%)**

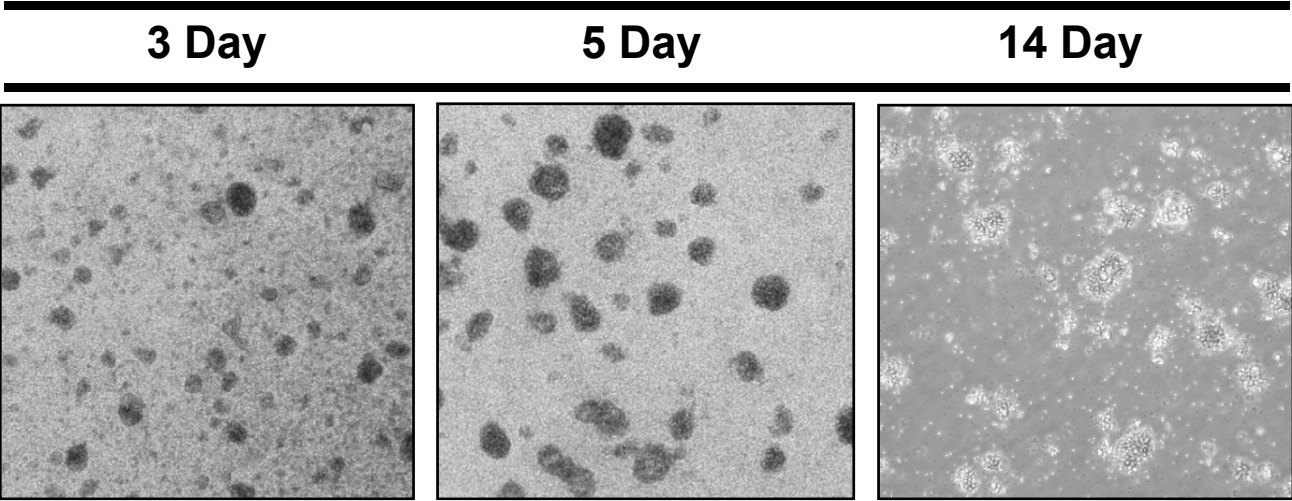

**Figure S9** Morphology of BBHS during 14-day culture

Supplement: cr201169x10.pdf [file cr201169x10.pdf]

**Supplementary information, Figure S2**

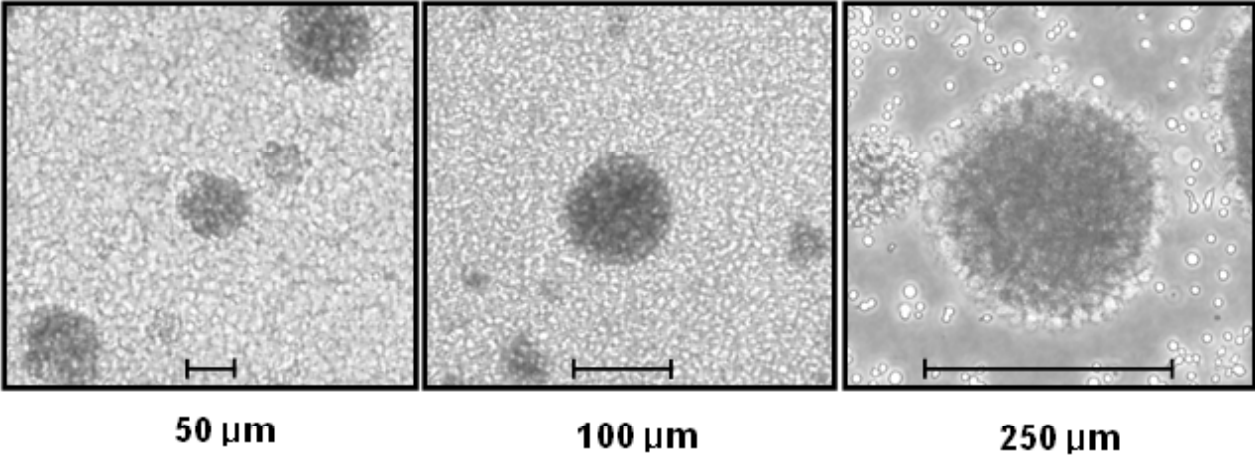

**Figure S2** Morphology of typical BBHS with different sizes.

Supplement: cr201169x3.pdf [file cr201169x3.pdf]
